# Supplementary material for: The Geochemical Features and Genesis of Ferromanganese Deposits from Caiwei Guyot, Northwestern Pacific Ocean
Source: MDPI journal article supplement (doi:10.3390/jmse10091275), 2022-09-09
Supplement: s1 [file s1]

**Table S4.** Statistical factor analysis for major and trace elements of the ferromanganese nodule.

|           | <b>Factor1</b> | <b>Factor2</b> | <b>Factor3</b> |
|-----------|----------------|----------------|----------------|
|           | 44.90%         | 39.80%         | 11.00%         |
| <b>Mn</b> | 0.856          | 0.429          | 0.231          |
| <b>Fe</b> | 0.913          | 0.358          | 0.195          |
| <b>Al</b> | 0.156          | -0.876         | -0.449         |
| <b>Ca</b> | 0.916          | 0.312          | -0.181         |
| <b>P</b>  | -0.648         | -0.183         | -0.739         |
| <b>K</b>  | 0.918          | -0.392         | -0.051         |
| <b>Ti</b> | -0.913         | 0.248          | 0.282          |
| <b>Mg</b> | 0.425          | 0.628          | 0.289          |
| <b>Na</b> | 0.831          | 0.455          | 0.279          |
| <b>Li</b> | 0.136          | -0.814         | -0.565         |
| <b>Be</b> | 0.178          | -0.749         | -0.630         |
| <b>Sc</b> | -0.885         | -0.347         | -0.240         |
| <b>V</b>  | -0.989         | -0.138         | -0.048         |
| <b>Co</b> | -0.230         | 0.614          | 0.755          |
| <b>Ni</b> | 0.786          | 0.401          | 0.385          |
| <b>Cu</b> | 0.406          | -0.841         | 0.358          |
| <b>Zn</b> | -0.937         | -0.273         | -0.125         |
| <b>Ga</b> | 0.516          | -0.436         | -0.733         |
| <b>Rb</b> | 0.088          | -0.904         | -0.340         |
| <b>Sr</b> | -0.995         | -0.095         | 0.025          |
| <b>Zr</b> | -0.589         | -0.664         | -0.334         |
| <b>Nb</b> | -0.806         | -0.480         | -0.004         |
| <b>Mo</b> | -0.977         | -0.178         | -0.079         |
| <b>Cd</b> | -0.958         | -0.276         | 0.007          |
| <b>Cs</b> | -0.315         | -0.856         | 0.060          |
| <b>Ba</b> | 0.907          | -0.083         | -0.335         |
| <b>Hf</b> | 0.984          | 0.028          | -0.004         |
| <b>Ta</b> | 0.793          | 0.336          | 0.120          |
| <b>W</b>  | 0.600          | 0.653          | 0.386          |
| <b>Tl</b> | -0.929         | 0.066          | 0.185          |
| <b>Pb</b> | -0.923         | 0.317          | 0.066          |
| <b>Bi</b> | 0.968          | 0.232          | -0.090         |
| <b>Th</b> | -0.423         | 0.703          | 0.372          |
| <b>U</b>  | -0.777         | 0.493          | 0.384          |
| <b>La</b> | 0.739          | 0.656          | 0.153          |
| <b>Ce</b> | 0.960          | 0.239          | 0.074          |
| <b>Pr</b> | 0.255          | 0.921          | 0.176          |
| <b>Nd</b> | 0.425          | 0.877          | 0.164          |
| <b>Sm</b> | 0.212          | 0.926          | 0.250          |
| <b>Eu</b> | 0.641          | 0.764          | 0.039          |

|           |        |        |        |
|-----------|--------|--------|--------|
| <b>Gd</b> | 0.295  | 0.909  | -0.281 |
| <b>Tb</b> | 0.362  | 0.913  | 0.133  |
| <b>Dy</b> | 0.296  | 0.914  | 0.245  |
| <b>Y</b>  | -0.172 | -0.376 | -0.856 |
| <b>Ho</b> | 0.034  | 0.987  | 0.151  |
| <b>Er</b> | 0.243  | 0.945  | 0.202  |
| <b>Tm</b> | 0.229  | 0.939  | 0.235  |
| <b>Yb</b> | 0.118  | 0.966  | 0.215  |
| <b>Lu</b> | 0.144  | 0.970  | 0.160  |

---
