# Supplementary material for: The Geochemical Features and Genesis of Ferromanganese Deposits from Caiwei Guyot, Northwestern Pacific Ocean
Source: MDPI journal article supplement (doi:10.3390/jmse10091275), 2022-09-09
Supplement: s1 [file s1]

**Table S2.** Statistical factor analysis for major and trace elements of ferromanganese crusts

|           | <b>Factor1</b> | <b>Factor2</b> | <b>Factor3</b> | <b>Factor4</b> |
|-----------|----------------|----------------|----------------|----------------|
|           | 35.50%         | 23.00%         | 18.50%         | 12.60%         |
| <b>Mn</b> | 0.257          | 0.446          | 0.681          | 0.425          |
| <b>Fe</b> | 0.013          | 0.516          | 0.162          | 0.819          |
| <b>Al</b> | -0.501         | -0.256         | -0.466         | -0.143         |
| <b>Si</b> | -0.364         | -0.282         | -0.837         | 0.221          |
| <b>Ca</b> | 0.206          | 0.587          | 0.693          | 0.065          |
| <b>P</b>  | -0.108         | -0.391         | -0.352         | -0.803         |
| <b>Mg</b> | -0.608         | 0.221          | -0.013         | 0.439          |
| <b>K</b>  | -0.510         | 0.142          | -0.034         | 0.289          |
| <b>Na</b> | 0.211          | -0.240         | 0.121          | 0.440          |
| <b>Ti</b> | -0.259         | 0.761          | 0.045          | -0.172         |
| <b>Li</b> | -0.586         | 0.387          | -0.592         | 0.109          |
| <b>Be</b> | 0.357          | 0.339          | -0.161         | -0.599         |
| <b>Sc</b> | 0.014          | -0.157         | -0.628         | -0.729         |
| <b>V</b>  | 0.786          | -0.150         | 0.158          | -0.506         |
| <b>Co</b> | 0.178          | -0.156         | 0.823          | 0.455          |
| <b>Ni</b> | -0.268         | 0.628          | 0.402          | 0.478          |
| <b>Cu</b> | -0.515         | 0.823          | -0.017         | 0.108          |
| <b>Zn</b> | 0.151          | 0.944          | -0.150         | -0.061         |
| <b>Ga</b> | 0.292          | 0.793          | -0.093         | 0.459          |
| <b>Rb</b> | -0.092         | 0.130          | -0.872         | -0.321         |
| <b>Sr</b> | 0.914          | -0.015         | 0.264          | -0.275         |
| <b>Zr</b> | 0.500          | 0.830          | -0.165         | -0.154         |
| <b>Nb</b> | -0.010         | 0.924          | -0.139         | 0.133          |
| <b>Mo</b> | 0.628          | -0.261         | 0.632          | -0.325         |
| <b>Cd</b> | 0.314          | 0.628          | 0.479          | 0.495          |
| <b>Cs</b> | -0.230         | 0.260          | -0.865         | -0.173         |
| <b>Ba</b> | 0.426          | 0.848          | 0.082          | -0.263         |
| <b>Hf</b> | -0.023         | 0.950          | -0.244         | 0.158          |
| <b>Ta</b> | -0.205         | 0.930          | 0.109          | 0.160          |
| <b>W</b>  | 0.514          | 0.292          | 0.772          | 0.096          |
| <b>Tl</b> | -0.427         | -0.341         | -0.367         | -0.735         |
| <b>Pb</b> | 0.295          | -0.138         | 0.725          | 0.468          |
| <b>Bi</b> | 0.281          | 0.764          | 0.436          | 0.324          |
| <b>Th</b> | 0.633          | -0.544         | 0.017          | 0.398          |
| <b>U</b>  | 0.539          | -0.142         | 0.788          | 0.083          |
| <b>La</b> | 0.749          | 0.008          | 0.530          | 0.192          |
| <b>Ce</b> | 0.142          | 0.768          | 0.507          | 0.259          |
| <b>Pr</b> | 0.984          | -0.028         | 0.125          | 0.042          |
| <b>Nd</b> | 0.981          | -0.020         | 0.159          | 0.062          |
| <b>Sm</b> | 0.976          | -0.048         | 0.169          | 0.048          |

|           |       |        |        |        |
|-----------|-------|--------|--------|--------|
| <b>Eu</b> | 0.929 | 0.040  | 0.319  | 0.066  |
| <b>Gd</b> | 0.970 | 0.085  | 0.179  | 0.079  |
| <b>Tb</b> | 0.970 | -0.018 | 0.188  | 0.136  |
| <b>Dy</b> | 0.969 | -0.009 | 0.217  | 0.096  |
| <b>Y</b>  | 0.800 | 0.367  | -0.028 | -0.409 |
| <b>Ho</b> | 0.948 | 0.097  | 0.276  | 0.117  |
| <b>Er</b> | 0.912 | 0.200  | 0.267  | 0.229  |
| <b>Tm</b> | 0.877 | 0.238  | 0.279  | 0.306  |
| <b>Yb</b> | 0.916 | 0.247  | 0.211  | 0.227  |
| <b>Lu</b> | 0.797 | 0.380  | 0.267  | 0.367  |

---
