# Supplementary material for: The Geochemical Features and Genesis of Ferromanganese Deposits from Caiwei Guyot, Northwestern Pacific Ocean
Source: MDPI journal article supplement (doi:10.3390/jmse10091275), 2022-09-09
Supplement: s1 [file s1]

**Table S3.** Pearson correlation for major and trace elements of the ferromanganese nodule

|              | Mn      | Fe      | Mn/Fe   | Al      | Ca      | P      | K       | Ti     | Mg      | Na      | Li      | Be      | Sc      | V       | Co      | Ni     | Cu     | Zn      | Ga     | Rb     | Sr      | Zr     | Nb     | Mo | Cd |
|--------------|---------|---------|---------|---------|---------|--------|---------|--------|---------|---------|---------|---------|---------|---------|---------|--------|--------|---------|--------|--------|---------|--------|--------|----|----|
| <b>Mn</b>    | 1       |         |         |         |         |        |         |        |         |         |         |         |         |         |         |        |        |         |        |        |         |        |        |    |    |
| <b>Fe</b>    | 0.982** | 1       |         |         |         |        |         |        |         |         |         |         |         |         |         |        |        |         |        |        |         |        |        |    |    |
| <b>Mn/Fe</b> | -0.906* | 0.970** | 1       |         |         |        |         |        |         |         |         |         |         |         |         |        |        |         |        |        |         |        |        |    |    |
| <b>Al</b>    | -0.332  | -0.258  | 0.127   | 1       |         |        |         |        |         |         |         |         |         |         |         |        |        |         |        |        |         |        |        |    |    |
| <b>Ca</b>    | 0.906*  | 0.914*  | -0.888* | -0.035  | 1       |        |         |        |         |         |         |         |         |         |         |        |        |         |        |        |         |        |        |    |    |
| <b>P</b>     | -0.808  | -0.802  | 0.735   | 0.389   | -0.522  | 1      |         |        |         |         |         |         |         |         |         |        |        |         |        |        |         |        |        |    |    |
| <b>K</b>     | 0.599   | 0.687   | -0.774  | 0.508   | 0.722   | -0.484 | 1       |        |         |         |         |         |         |         |         |        |        |         |        |        |         |        |        |    |    |
| <b>Ti</b>    | -0.581  | -0.688  | 0.802   | -0.474  | -0.782  | 0.333  | -0.955* | 1      |         |         |         |         |         |         |         |        |        |         |        |        |         |        |        |    |    |
| <b>Mg</b>    | 0.802   | 0.675   | -0.477  | -0.569  | 0.635   | -0.620 | 0.110   | -0.057 | 1       |         |         |         |         |         |         |        |        |         |        |        |         |        |        |    |    |
| <b>Na</b>    | 0.998** | 0.978** | -0.898* | -0.382  | 0.880*  | -0.832 | 0.565   | -0.542 | 0.811   | 1       |         |         |         |         |         |        |        |         |        |        |         |        |        |    |    |
| <b>Li</b>    | -0.365  | -0.277  | 0.128   | 0.987** | -0.029  | 0.478  | 0.474   | -0.487 | -0.624  | -0.416  | 1       |         |         |         |         |        |        |         |        |        |         |        |        |    |    |
| <b>Be</b>    | -0.332  | -0.230  | 0.065   | 0.960** | 0.027   | 0.490  | 0.493   | -0.541 | -0.633  | -0.384  | 0.991** | 1       |         |         |         |        |        |         |        |        |         |        |        |    |    |
| <b>Sc</b>    | 0.996** | 0.982** | 0.912*  | 0.259   | -0.910* | 0.820  | -0.658  | 0.623  | -0.777  | 0.991** | 0.300   | 0.273   | 1       |         |         |        |        |         |        |        |         |        |        |    |    |
| <b>V</b>     | -0.915* | 0.962** | 0.976** | -0.012  | -0.939* | 0.701  | -0.852  | 0.857  | -0.515  | -0.897* | 0.004   | -0.044  | 0.933*  | 1       |         |        |        |         |        |        |         |        |        |    |    |
| <b>Co</b>    | 0.237   | 0.157   | -0.019  | -0.915* | -0.160  | -0.520 | -0.490  | 0.572  | 0.494   | 0.295   | -0.957* | 0.975** | -0.187  | 0.106   | 1       |        |        |         |        |        |         |        |        |    |    |
| <b>Ni</b>    | 0.885*  | 0.933*  | -0.934* | -0.422  | 0.727   | -0.858 | 0.553   | -0.553 | 0.536   | 0.900*  | -0.432  | -0.376  | -0.874  | -0.853  | 0.361   | 1      |        |         |        |        |         |        |        |    |    |
| <b>Cu</b>    | 0.073   | 0.140   | -0.219  | 0.641   | 0.049   | -0.374 | 0.684   | -0.475 | -0.240  | 0.058   | 0.537   | 0.475   | -0.158  | -0.303  | -0.340  | 0.114  | 1      |         |        |        |         |        |        |    |    |
| <b>Zn</b>    | 0.979** | 0.979** | 0.932*  | 0.135   | -0.952* | 0.754  | -0.740  | 0.723  | -0.711  | 0.966** | 0.168   | 0.134   | 0.989** | 0.968** | -0.043  | -0.844 | -0.199 | 1       |        |        |         |        |        |    |    |
| <b>Ga</b>    | 0.071   | 0.171   | -0.314  | 0.787   | 0.456   | 0.290  | 0.685   | -0.798 | -0.312  | 0.014   | 0.840   | 0.889*  | -0.114  | -0.415  | -0.938* | -0.031 | 0.312  | -0.258  | 1      |        |         |        |        |    |    |
| <b>Rb</b>    | -0.434  | -0.313  | 0.127   | 0.940*  | -0.183  | 0.367  | 0.460   | -0.439 | -0.771  | -0.471  | 0.943*  | 0.931*  | 0.366   | 0.052   | -0.827  | -0.357 | 0.669  | 0.251   | 0.708  | 1      |         |        |        |    |    |
| <b>Sr</b>    | -0.882* | -0.937* | 0.966** | -0.081  | -0.941* | 0.643  | -0.878  | 0.896* | -0.460  | -0.859  | -0.072  | -0.124  | 0.903*  | 0.996** | 0.188   | -0.817 | -0.315 | 0.950*  | -0.491 | -0.016 | 1       |        |        |    |    |
| <b>Zr</b>    | -0.921* | -0.844  | 0.695   | 0.615   | -0.741  | 0.759  | -0.253  | 0.228  | -0.949* | -0.934* | 0.653   | 0.634   | 0.894*  | 0.687   | -0.518  | -0.770 | 0.193  | 0.832   | 0.255  | 0.740  | 0.633   | 1      |        |    |    |
| <b>Nb</b>    | -0.957* | -0.913* | 0.814   | 0.270   | -0.948* | 0.623  | -0.540  | 0.560  | -0.847  | -0.944* | 0.288   | 0.252   | 0.949*  | 0.861   | -0.106  | -0.733 | 0.067  | 0.949*  | -0.177 | 0.449  | 0.839   | 0.905* | 1      |    |    |
| <b>Mo</b>    | -0.946* | 0.972** | 0.959** | 0.032   | -0.952* | 0.727  | -0.820  | 0.811  | -0.601  | -0.929* | 0.058   | 0.018   | 0.963** | 0.994** | 0.057   | -0.845 | -0.277 | 0.989** | -0.361 | 0.124  | 0.984** | 0.748  | 0.904* | 1  |    |

|           |           |           |              |           |           |          |          |           |           |           |           |           |           |          |           |           |           |           |           |           |           |           |           |           |           |
|-----------|-----------|-----------|--------------|-----------|-----------|----------|----------|-----------|-----------|-----------|-----------|-----------|-----------|----------|-----------|-----------|-----------|-----------|-----------|-----------|-----------|-----------|-----------|-----------|-----------|
| <b>Cd</b> | -0.923*   | 0.971**   | 0.986**      | 0.095     | -0.951*   | 0.664    | -0.774   | 0.820     | -0.533    | -0.908*   | 0.090     | 0.025     | 0.927*    | 0.986**  | 0.054     | -0.882*   | -0.153    | 0.958*    | -0.384    | 0.145     | 0.981**   | 0.721     | 0.878     | 0.978**   | 1         |
|           | <b>Mn</b> | <b>Fe</b> | <b>Mn/Fe</b> | <b>Al</b> | <b>Ca</b> | <b>P</b> | <b>K</b> | <b>Ti</b> | <b>Mg</b> | <b>Na</b> | <b>Li</b> | <b>Be</b> | <b>Sc</b> | <b>V</b> | <b>Co</b> | <b>Ni</b> | <b>Cu</b> | <b>Zn</b> | <b>Ga</b> | <b>Rb</b> | <b>Sr</b> | <b>Zr</b> | <b>Nb</b> | <b>Mo</b> | <b>Cd</b> |
| <b>Cs</b> | -0.694    | -0.586    | 0.421        | 0.643     | -0.637    | 0.328    | 0.057    | 0.027     | -0.891*   | -0.698    | 0.625     | 0.586     | 0.641     | 0.422    | -0.399    | -0.456    | 0.605     | 0.594     | 0.198     | 0.825     | 0.386     | 0.862     | 0.805     | 0.491     | 0.507     |
| <b>Ba</b> | 0.620     | 0.730     | -0.845       | 0.347     | 0.823     | -0.317   | 0.890*   | -0.982**  | 0.094     | 0.584     | 0.384     | 0.458     | -0.646    | -0.872   | -0.508    | 0.616     | 0.313     | -0.741    | 0.768     | 0.327     | -0.908*   | -0.290    | -0.606    | -0.823    | -0.867    |
| <b>Hf</b> | 0.823     | 0.906*    | -0.970**     | 0.118     | 0.881*    | -0.635   | 0.898*   | -0.921*   | 0.333     | 0.803     | 0.116     | 0.173     | -0.846    | -0.979** | -0.208    | 0.831     | 0.371     | -0.898*   | 0.511     | 0.104     | -0.986**  | -0.542    | -0.747    | -0.951*   | -0.964**  |
| <b>Ta</b> | 0.764     | 0.862     | -0.936*      | -0.262    | 0.723     | -0.650   | 0.606    | -0.686    | 0.294     | 0.768     | -0.227    | -0.139    | -0.751    | -0.841   | 0.125     | 0.939*    | 0.072     | -0.760    | 0.212     | -0.155    | -0.830    | -0.573    | -0.631    | -0.800    | -0.890*   |
| <b>W</b>  | 0.838     | 0.854     | -0.815       | -0.671    | 0.638     | -0.786   | 0.283    | -0.318    | 0.627     | 0.863     | -0.664    | -0.601    | -0.801    | -0.704   | 0.559     | 0.951*    | -0.172    | -0.742    | -0.239    | -0.606    | -0.656    | -0.834    | -0.710    | -0.710    | -0.772    |
| <b>Tl</b> | -0.779    | -0.792    | 0.784        | -0.310    | -0.919*   | 0.462    | -0.878   | 0.866     | -0.483    | -0.740    | -0.280    | -0.301    | 0.816     | 0.898*   | 0.400     | -0.547    | -0.373    | 0.886*    | -0.620    | -0.127    | 0.915*    | 0.541     | 0.825     | 0.909*    | 0.849     |
| <b>Pb</b> | -0.675    | -0.718    | 0.750        | -0.468    | -0.795    | 0.497    | -0.968** | 0.906*    | -0.296    | -0.637    | -0.418    | -0.423    | 0.732     | 0.864    | 0.461     | -0.515    | -0.622    | 0.807     | -0.646    | -0.339    | 0.884*    | 0.377     | 0.664     | 0.858     | 0.780     |
| <b>Bi</b> | 0.901*    | 0.949*    | -0.967**     | -0.014    | 0.970**   | -0.602   | 0.803    | -0.857    | 0.512     | 0.880*    | -0.006    | 0.058     | -0.910*   | -0.986** | -0.148    | 0.827     | 0.166     | -0.953*   | 0.466     | -0.087    | -0.988**  | -0.684    | -0.881*   | -0.977**  | -0.994**  |
| <b>Th</b> | 0.102     | -0.057    | 0.270        | -0.816    | -0.159    | -0.142   | -0.697   | 0.735     | 0.623     | 0.140     | -0.846    | -0.879*   | -0.044    | 0.308    | 0.801     | -0.026    | -0.621    | 0.079     | -0.831    | -0.905*   | 0.374     | -0.480    | -0.148    | 0.220     | 0.247     |
| <b>U</b>  | -0.377    | -0.458    | 0.559        | -0.732    | -0.641    | 0.131    | -0.924*  | 0.927*    | 0.046     | -0.326    | -0.723    | -0.743    | 0.439     | 0.681    | 0.773     | -0.244    | -0.594    | 0.558     | -0.892*   | -0.626    | 0.733     | 0.026     | 0.414     | 0.647     | 0.604     |
| <b>La</b> | 0.944*    | 0.939*    | -0.878*      | -0.530    | 0.849     | -0.711   | 0.414    | -0.473    | 0.755     | 0.951*    | -0.519    | -0.454    | -0.914*   | -0.829   | 0.348     | 0.909*    | -0.197    | -0.886*   | -0.015    | -0.574    | -0.794    | -0.913*   | -0.902*   | -0.849    | -0.890*   |
| <b>Ce</b> | 0.919*    | 0.975**   | -0.997**     | -0.102    | 0.918*    | -0.716   | 0.788    | -0.817    | 0.505     | 0.907*    | -0.103    | -0.042    | -0.926*   | -0.987** | -0.016    | 0.913*    | 0.213     | -0.951*   | 0.347     | -0.126    | -0.979**  | -0.708    | -0.845    | -0.975**  | -0.995**  |
| <b>Pr</b> | 0.613     | 0.594     | -0.526       | -0.864    | 0.447     | -0.457   | -0.129   | 0.008     | 0.600     | 0.643     | -0.811    | -0.733    | -0.542    | -0.390   | 0.645     | 0.701     | -0.613    | -0.469    | -0.382    | -0.813    | -0.343    | -0.745    | -0.567    | -0.406    | -0.516    |
| <b>Nd</b> | 0.751     | 0.732     | -0.659       | -0.787    | 0.606     | -0.553   | 0.042    | -0.149    | 0.689     | 0.774     | -0.747    | -0.670    | -0.691    | -0.551   | 0.568     | 0.790     | -0.509    | -0.630    | -0.272    | -0.774    | -0.506    | -0.839    | -0.712    | -0.571    | -0.660    |
| <b>Sm</b> | 0.604     | 0.572     | -0.486       | -0.905*   | 0.405     | -0.486   | -0.175   | 0.076     | 0.634     | 0.638     | -0.864    | -0.796    | -0.533    | -0.351   | 0.712     | 0.685     | -0.607    | -0.449    | -0.464    | -0.858    | -0.298    | -0.764    | -0.552    | -0.376    | -0.472    |
| <b>Eu</b> | 0.873     | 0.865     | -0.806       | -0.591    | 0.807     | -0.581   | 0.289    | -0.396    | 0.724     | 0.880*    | -0.555    | -0.476    | -0.829    | -0.742   | 0.352     | 0.842     | -0.369    | -0.802    | -0.026    | -0.631    | -0.711    | -0.876    | -0.861    | -0.759    | -0.830    |
| <b>Gd</b> | 0.562     | 0.539     | -0.481       | -0.631    | 0.589     | -0.147   | -0.069   | -0.137    | 0.564     | 0.567     | -0.540    | -0.443    | -0.492    | -0.404   | 0.280     | 0.511     | -0.747    | -0.473    | -0.032    | -0.679    | -0.389    | -0.655    | -0.643    | -0.420    | -0.542    |
| <b>Tb</b> | 0.710     | 0.682     | -0.601       | -0.813    | 0.570     | -0.496   | -0.029   | -0.088    | 0.690     | 0.733     | -0.767    | -0.691    | -0.644    | -0.492   | 0.580     | 0.737     | -0.576    | -0.582    | -0.299    | -0.807    | -0.447    | -0.823    | -0.686    | -0.516    | -0.609    |
| <b>Dy</b> | 0.680     | 0.644     | -0.551       | -0.875    | 0.489     | -0.537   | -0.095   | 0.005     | 0.695     | 0.710     | -0.840    | -0.775    | -0.614    | -0.432   | 0.681     | 0.728     | -0.563    | -0.534    | -0.416    | -0.852    | -0.379    | -0.822    | -0.634    | -0.460    | -0.545    |
| <b>Y</b>  | -0.452    | -0.456    | 0.408        | 0.710     | -0.065    | 0.804    | 0.023    | -0.127    | -0.374    | -0.504    | 0.761     | 0.760     | 0.428     | 0.266    | -0.843    | -0.700    | -0.054    | 0.314     | 0.678     | 0.539     | 0.194     | 0.538     | 0.215     | 0.276     | 0.287     |
| <b>Ho</b> | 0.481     | 0.413     | -0.292       | -0.930*   | 0.305     | -0.313   | -0.363   | 0.251     | 0.657     | 0.514     | -0.884*   | -0.826    | -0.402    | -0.177   | 0.713     | 0.490     | -0.763    | -0.314    | -0.521    | -0.932*   | -0.125    | -0.714    | -0.490    | -0.218    | -0.307    |
| <b>Er</b> | 0.644     | 0.599     | -0.496       | -0.887*   | 0.465     | -0.477   | -0.155   | 0.054     | 0.702     | 0.674     | -0.848    | -0.783    | -0.574    | -0.381   | 0.678     | 0.671     | -0.625    | -0.495    | -0.428    | -0.879*   | -0.329    | -0.809    | -0.620    | -0.414    | -0.500    |
| <b>Tm</b> | 0.635     | 0.590     | -0.487       | -0.901*   | 0.442     | -0.490   | -0.168   | 0.074     | 0.696     | 0.667     | -0.865    | -0.802    | -0.565    | -0.368   | 0.703     | 0.673     | -0.615    | -0.482    | -0.456    | -0.884*   | -0.314    | -0.804    | -0.601    | -0.400    | -0.485    |
| <b>Yb</b> | 0.551     | 0.495     | -0.383       | -0.931*   | 0.357     | -0.409   | -0.279   | 0.179     | 0.672     | 0.585     | -0.890*   | -0.831    | -0.476    | -0.261   | 0.730     | 0.584     | -0.689    | -0.387    | -0.512    | -0.917*   | -0.207    | -0.757    | -0.533    | -0.298    | -0.385    |
| <b>Lu</b> | 0.555     | 0.508     | -0.408       | -0.908*   | 0.384     | -0.385   | -0.253   | 0.136     | 0.648     | 0.587     | -0.859    | -0.791    | -0.480    | -0.284   | 0.686     | 0.595     | -0.702    | -0.398    | -0.458    | -0.890*   | -0.234    | -0.744    | -0.542    | -0.315    | -0.414    |

| GR | -0.793 | -0.878 | 0.948*  | -0.182 | -0.897* | 0.552   | -0.907* | 0.949*  | -0.304 | -0.767 | -0.189  | -0.251 | 0.818   | 0.969** | 0.299   | -0.775 | -0.346 | 0.882*  | -0.595  | -0.150 | 0.985** | 0.501   | 0.745   | 0.939*  | 0.957* |
|----|--------|--------|---------|--------|---------|---------|---------|---------|--------|--------|---------|--------|---------|---------|---------|--------|--------|---------|---------|--------|---------|---------|---------|---------|--------|
|    | Cs     | Ba     | Hf      | Ta     | W       | Tl      | Pb      | Bi      | Th     | U      | La      | Ce     | Pr      | Nd      | Sm      | Eu     | Gd     | Tb      | Dy      | Y      | Ho      | Er      | Tm      | Yb      | Lu     |
| Cs | 1      |        |         |        |         |         |         |         |        |        |         |        |         |         |         |        |        |         |         |        |         |         |         |         |        |
| Ba | -0.136 | 1      |         |        |         |         |         |         |        |        |         |        |         |         |         |        |        |         |         |        |         |         |         |         |        |
| Hf | -0.264 | 0.934* | 1       |        |         |         |         |         |        |        |         |        |         |         |         |        |        |         |         |        |         |         |         |         |        |
| Ta | -0.330 | 0.770  | 0.876   | 1      |         |         |         |         |        |        |         |        |         |         |         |        |        |         |         |        |         |         |         |         |        |
| W  | -0.621 | 0.422  | 0.652   | 0.868  | 1       |         |         |         |        |        |         |        |         |         |         |        |        |         |         |        |         |         |         |         |        |
| Tl | 0.374  | -0.834 | -0.859  | -0.538 | -0.363  | 1       |         |         |        |        |         |        |         |         |         |        |        |         |         |        |         |         |         |         |        |
| Pb | 0.108  | -0.834 | -0.863  | -0.514 | -0.268  | 0.956*  | 1       |         |        |        |         |        |         |         |         |        |        |         |         |        |         |         |         |         |        |
| Bi | -0.496 | 0.896* | 0.965** | 0.850  | 0.705   | -0.891* | -0.819  | 1       |        |        |         |        |         |         |         |        |        |         |         |        |         |         |         |         |        |
| Th | -0.622 | -0.671 | -0.473  | -0.268 | 0.238   | 0.372   | 0.547   | -0.293  | 1      |        |         |        |         |         |         |        |        |         |         |        |         |         |         |         |        |
| U  | -0.124 | -0.855 | -0.739  | -0.366 | 0.024   | 0.849   | 0.914*  | -0.670  | 0.785  | 1      |         |        |         |         |         |        |        |         |         |        |         |         |         |         |        |
| La | -0.774 | 0.571  | 0.750   | 0.837  | 0.937*  | -0.607  | -0.458  | 0.854   | 0.194  | -0.190 | 1       |        |         |         |         |        |        |         |         |        |         |         |         |         |        |
| Ce | -0.451 | 0.857  | 0.973** | 0.913* | 0.792   | -0.823  | -0.779  | 0.982** | -0.266 | -0.590 | 0.880*  | 1      |         |         |         |        |        |         |         |        |         |         |         |         |        |
| Pr | -0.763 | 0.153  | 0.317   | 0.649  | 0.882*  | -0.070  | 0.118   | 0.452   | 0.504  | 0.342  | 0.825   | 0.507  | 1       |         |         |        |        |         |         |        |         |         |         |         |        |
| Nd | -0.813 | 0.294  | 0.469   | 0.727  | 0.930*  | -0.259  | -0.071  | 0.605   | 0.432  | 0.178  | 0.918*  | 0.649  | 0.981** | 1       |         |        |        |         |         |        |         |         |         |         |        |
| Sm | -0.769 | 0.077  | 0.267   | 0.602  | 0.876   | -0.031  | 0.154   | 0.403   | 0.574  | 0.403  | 0.807   | 0.467  | 0.995** | 0.972** | 1       |        |        |         |         |        |         |         |         |         |        |
| Eu | -0.826 | 0.521  | 0.664   | 0.802  | 0.915*  | -0.517  | -0.332  | 0.796   | 0.252  | -0.101 | 0.982** | 0.809  | 0.889*  | 0.959*  | 0.865   | 1      |        |         |         |        |         |         |         |         |        |
| Gd | -0.853 | 0.307  | 0.332   | 0.548  | 0.683   | -0.239  | 0.016   | 0.524   | 0.372  | 0.118  | 0.773   | 0.490  | 0.883*  | 0.890*  | 0.850   | 0.878  | 1      |         |         |        |         |         |         |         |        |
| Tb | -0.835 | 0.240  | 0.405   | 0.674  | 0.898*  | -0.211  | -0.008  | 0.554   | 0.482  | 0.230  | 0.890*  | 0.592  | 0.988** | 0.997** | 0.980** | 0.943* | 0.911* | 1       |         |        |         |         |         |         |        |
| Dy | -0.809 | 0.142  | 0.339   | 0.635  | 0.902*  | -0.130  | 0.060   | 0.481   | 0.553  | 0.325  | 0.859   | 0.537  | 0.991** | 0.987** | 0.995** | 0.906* | 0.860  | 0.992** | 1       |        |         |         |         |         |        |
| Y  | 0.198  | 0.086  | -0.231  | -0.520 | -0.758  | -0.120  | -0.082  | -0.187  | -0.374 | -0.404 | -0.512  | -0.357 | -0.614  | -0.591  | -0.657  | -0.451 | -0.178 | -0.560  | -0.644  | 1      |         |         |         |         |        |
| Ho | -0.833 | -0.093 | 0.067   | 0.394  | 0.732   | 0.073   | 0.299   | 0.249   | 0.721  | 0.522  | 0.696   | 0.284  | 0.953*  | 0.910*  | 0.966** | 0.784  | 0.868  | 0.939*  | 0.954*  | -0.517 | 1       |         |         |         |        |
| Er | -0.837 | 0.096  | 0.281   | 0.579  | 0.863   | -0.099  | 0.107   | 0.439   | 0.598  | 0.361  | 0.832   | 0.485  | 0.989** | 0.979** | 0.993** | 0.891* | 0.881* | 0.989** | 0.996** | -0.597 | 0.974** | 1       |         |         |        |
| Tm | -0.821 | 0.075  | 0.268   | 0.575  | 0.866   | -0.076  | 0.124   | 0.421   | 0.608  | 0.384  | 0.823   | 0.474  | 0.989** | 0.975** | 0.996** | 0.880* | 0.864  | 0.985** | 0.997** | -0.624 | 0.974** | 0.999** | 1       |         |        |
| Yb | -0.819 | -0.025 | 0.157   | 0.484  | 0.805   | 0.018   | 0.228   | 0.322   | 0.675  | 0.473  | 0.756   | 0.370  | 0.977** | 0.945*  | 0.988** | 0.827  | 0.860  | 0.964** | 0.981** | -0.592 | 0.993** | 0.992** | 0.993** | 1       |        |
| Lu | -0.818 | 0.024  | 0.189   | 0.517  | 0.810   | -0.003  | 0.210   | 0.353   | 0.630  | 0.437  | 0.769   | 0.396  | 0.986** | 0.956*  | 0.990** | 0.847  | 0.889* | 0.974** | 0.983** | -0.562 | 0.990** | 0.994** | 0.993** | 0.998** | 1      |

|           |       |          |          |        |        |        |       |          |       |       |        |         |        |        |        |        |        |        |        |       |        |        |        |        |        |
|-----------|-------|----------|----------|--------|--------|--------|-------|----------|-------|-------|--------|---------|--------|--------|--------|--------|--------|--------|--------|-------|--------|--------|--------|--------|--------|
| <b>GR</b> | 0.265 | -0.963** | -0.994** | -0.844 | -0.593 | 0.885* | 0.878 | -0.968** | 0.514 | 0.788 | -0.721 | -0.957* | -0.277 | -0.433 | -0.220 | -0.644 | -0.345 | -0.372 | -0.294 | 0.126 | -0.034 | -0.241 | -0.225 | -0.116 | -0.153 |
|-----------|-------|----------|----------|--------|--------|--------|-------|----------|-------|-------|--------|---------|--------|--------|--------|--------|--------|--------|--------|-------|--------|--------|--------|--------|--------|

---

## GR-Growth rates

The values followed by \* are correlations.at 95% confidence level.

The values followed by \*\* are correlations.at 99% confidence level.
