# Supplementary material for: The Geochemical Features and Genesis of Ferromanganese Deposits from Caiwei Guyot, Northwestern Pacific Ocean
Source: MDPI journal article supplement (doi:10.3390/jmse10091275), 2022-09-09
Supplement: s1 [file s1]

**Table S1.** Pearson correlation for major and trace elements of ferromanganese crusts

|              | Mn       | Fe       | Al      | Si       | Mn/Fe   | Ca      | P       | Mg      | K      | Na     | Ti     | GR       | Li       | Be     | Sc       | V       | Co       | Ni      | Cu      | Zn      | Ga      | Rb     | Sr     | Zr      | Nb | Mo |
|--------------|----------|----------|---------|----------|---------|---------|---------|---------|--------|--------|--------|----------|----------|--------|----------|---------|----------|---------|---------|---------|---------|--------|--------|---------|----|----|
| <b>Mn</b>    | 1        |          |         |          |         |         |         |         |        |        |        |          |          |        |          |         |          |         |         |         |         |        |        |         |    |    |
| <b>Fe</b>    | 0.699*   | 1        |         |          |         |         |         |         |        |        |        |          |          |        |          |         |          |         |         |         |         |        |        |         |    |    |
| <b>Al</b>    | -0.807** | -0.332   | 1       |          |         |         |         |         |        |        |        |          |          |        |          |         |          |         |         |         |         |        |        |         |    |    |
| <b>Si</b>    | -0.652*  | -0.092   | 0.540   | 1        |         |         |         |         |        |        |        |          |          |        |          |         |          |         |         |         |         |        |        |         |    |    |
| <b>Mn/Fe</b> | 0.377    | -0.394   | -0.642* | -0.684*  | 1       |         |         |         |        |        |        |          |          |        |          |         |          |         |         |         |         |        |        |         |    |    |
| <b>Ca</b>    | 0.890**  | 0.487    | -0.705* | -0.768** | 0.505   | 1       |         |         |        |        |        |          |          |        |          |         |          |         |         |         |         |        |        |         |    |    |
| <b>P</b>     | -0.809** | -0.930** | 0.457   | 0.238    | 0.176   | -0.551  | 1       |         |        |        |        |          |          |        |          |         |          |         |         |         |         |        |        |         |    |    |
| <b>Mg</b>    | -0.048   | 0.426    | 0.527   | 0.184    | -0.638* | -0.133  | -0.304  | 1       |        |        |        |          |          |        |          |         |          |         |         |         |         |        |        |         |    |    |
| <b>K</b>     | -0.079   | 0.390    | 0.563   | 0.220    | -0.643* | -0.008  | -0.230  | 0.590*  | 1      |        |        |          |          |        |          |         |          |         |         |         |         |        |        |         |    |    |
| <b>Na</b>    | 0.372    | 0.357    | -0.387  | 0.074    | 0.025   | 0.247   | -0.345  | -0.330  | 0.209  | 1      |        |          |          |        |          |         |          |         |         |         |         |        |        |         |    |    |
| <b>Ti</b>    | 0.120    | 0.270    | 0.231   | -0.226   | -0.218  | 0.338   | -0.205  | 0.412   | 0.448  | -0.497 | 1      |          |          |        |          |         |          |         |         |         |         |        |        |         |    |    |
| <b>GR</b>    | -0.063   | 0.201    | 0.008   | 0.353    | -0.285  | 0.099   | 0.008   | -0.032  | 0.166  | 0.027  | 0.406  | 1        |          |        |          |         |          |         |         |         |         |        |        |         |    |    |
| <b>Li</b>    | -0.355   | 0.130    | 0.433   | 0.598*   | -0.580* | -0.337  | 0.098   | 0.588*  | 0.215  | -0.411 | 0.301  | 0.587*   | 1        |        |          |         |          |         |         |         |         |        |        |         |    |    |
| <b>Be</b>    | -0.072   | -0.235   | -0.163  | -0.160   | 0.234   | 0.190   | 0.344   | -0.503  | -0.088 | 0.060  | 0.212  | 0.386    | -0.172   | 1      |          |         |          |         |         |         |         |        |        |         |    |    |
| <b>Sc</b>    | -0.846** | -0.780** | 0.494   | 0.388    | -0.055  | -0.628* | 0.883** | -0.289  | -0.202 | -0.449 | -0.011 | 0.251    | 0.257    | 0.473  | 1        |         |          |         |         |         |         |        |        |         |    |    |
| <b>V</b>     | -0.044   | -0.478   | -0.202  | -0.529   | 0.532   | 0.091   | 0.347   | -0.572  | -0.507 | -0.136 | -0.142 | -0.289   | -0.638*  | 0.437  | 0.321    | 1       |          |         |         |         |         |        |        |         |    |    |
| <b>Co</b>    | 0.721**  | 0.429    | -0.521  | -0.607*  | 0.337   | 0.487   | -0.616* | 0.083   | -0.097 | 0.276  | -0.224 | -0.718** | -0.570   | -0.375 | -0.793** | 0.060   | 1        |         |         |         |         |        |        |         |    |    |
| <b>Ni</b>    | 0.683*   | 0.729**  | -0.350  | -0.327   | -0.054  | 0.564   | -0.699* | 0.567   | 0.110  | -0.132 | 0.375  | 0.091    | 0.348    | -0.340 | -0.667*  | -0.473  | 0.460    | 1       |         |         |         |        |        |         |    |    |
| <b>Cu</b>    | 0.277    | 0.494    | 0.008   | -0.007   | -0.254  | 0.399   | -0.304  | 0.538   | 0.376  | -0.229 | 0.658* | 0.614*   | 0.695*   | 0.031  | -0.195   | -0.594* | -0.190   | 0.736** | 1       |         |         |        |        |         |    |    |
| <b>Zn</b>    | 0.291    | 0.381    | -0.179  | -0.233   | -0.098  | 0.436   | -0.249  | 0.209   | -0.020 | -0.397 | 0.693* | 0.638*   | 0.435    | 0.352  | 0.011    | 0.030   | -0.255   | 0.525   | 0.712** | 1       |         |        |        |         |    |    |
| <b>Ga</b>    | 0.549    | 0.732**  | -0.387  | -0.179   | -0.219  | 0.456   | -0.647* | 0.254   | -0.034 | -0.060 | 0.397  | 0.497    | 0.320    | -0.009 | -0.387   | -0.108  | 0.071    | 0.679*  | 0.569   | 0.820** | 1       |        |        |         |    |    |
| <b>Rb</b>    | -0.619*  | -0.359   | 0.266   | 0.684*   | -0.265  | -0.541  | 0.515   | -0.171  | -0.224 | -0.265 | -0.010 | 0.677*   | 0.633*   | 0.314  | 0.746**  | -0.125  | -0.878** | -0.327  | 0.154   | 0.251   | 0.044   | 1      |        |         |    |    |
| <b>Sr</b>    | 0.256    | -0.192   | -0.463  | -0.629*  | 0.552   | 0.313   | 0.044   | -0.603* | -0.535 | 0.027  | -0.146 | -0.260   | -0.709** | 0.400  | 0.059    | 0.940** | 0.257    | -0.270  | -0.521  | 0.126   | 0.120   | -0.253 | 1      |         |    |    |
| <b>Zr</b>    | 0.310    | 0.292    | -0.322  | -0.311   | 0.037   | 0.463   | -0.209  | -0.175  | -0.109 | -0.169 | 0.562  | 0.616*   | 0.082    | 0.596* | 0.094    | 0.327   | -0.254   | 0.219   | 0.400   | 0.884** | 0.734** | 0.233  | 0.447  | 1       |    |    |
| <b>Nb</b>    | 0.380    | 0.592*   | -0.240  | -0.108   | -0.234  | 0.412   | -0.409  | 0.263   | 0.160  | -0.130 | 0.595* | 0.661*   | 0.464    | 0.357  | -0.126   | -0.257  | -0.148   | 0.622*  | 0.785** | 0.862** | 0.801** | 0.227  | -0.111 | 0.760** | 1  |    |

|    |          |          |          |          |         |         |          |        |        |        |         |         |          |        |          |         |          |         |          |         |         |          |         |         |         |          |
|----|----------|----------|----------|----------|---------|---------|----------|--------|--------|--------|---------|---------|----------|--------|----------|---------|----------|---------|----------|---------|---------|----------|---------|---------|---------|----------|
| Mo | 0.329    | -0.302   | -0.463   | -0.758** | 0.775** | 0.396   | 0.086    | -0.544 | -0.449 | 0.148  | -0.294  | -0.564  | -0.859** | 0.229  | -0.115   | 0.824** | 0.512    | -0.229  | -0.572   | -0.212  | -0.220  | -0.545   | 0.846** | 0.045   | -0.383  | 1        |
|    | Mn       | Fe       | Al       | Si       | Mn/Fe   | Ca      | P        | Mg     | K      | Na     | Ti      | GR      | Li       | Be     | Sc       | V       | Co       | Ni      | Cu       | Zn      | Ga      | Rb       | Sr      | Zr      | Nb      | Mo       |
| Cd | 0.869**  | 0.787**  | -0.558   | -0.602*  | 0.081   | 0.788** | -0.818** | 0.238  | 0.042  | 0.110  | 0.348   | 0.044   | -0.127   | -0.107 | -0.754** | 0.014   | 0.571    | 0.764** | 0.414    | 0.577*  | 0.797** | -0.542   | 0.287   | 0.519   | 0.544   | 0.191    |
| Cs | -0.529   | -0.163   | 0.283    | 0.724**  | -0.399  | -0.481  | 0.355    | 0.003  | -0.067 | -0.239 | 0.105   | 0.763** | 0.761**  | 0.238  | 0.612*   | -0.328  | -0.850** | -0.147  | 0.342    | 0.333   | 0.167   | 0.970**  | -0.422  | 0.250   | 0.377   | -0.710** |
| Ba | 0.458    | 0.244    | -0.477   | -0.512   | 0.290   | 0.659*  | -0.211   | -0.264 | -0.184 | -0.170 | 0.579*  | 0.546   | -0.022   | 0.569  | -0.002   | 0.328   | -0.129   | 0.303   | 0.446    | 0.846** | 0.661*  | 0.099    | 0.459   | 0.945** | 0.713** | 0.171    |
| Hf | 0.325    | 0.598*   | -0.150   | -0.012   | -0.323  | 0.401   | -0.415   | 0.267  | 0.239  | -0.142 | 0.684*  | 0.775** | 0.521    | 0.306  | -0.105   | -0.298  | -0.278   | 0.564   | 0.815**  | 0.900** | 0.823** | 0.285    | -0.153  | 0.797** | 0.954** | -0.476   |
| Ta | 0.511    | 0.661*   | -0.187   | -0.229   | -0.186  | 0.613*  | -0.540   | 0.367  | 0.399  | -0.087 | 0.803** | 0.584*  | 0.349    | 0.222  | -0.357   | -0.377  | -0.034   | 0.679*  | 0.855**  | 0.783** | 0.690*  | -0.044   | -0.225  | 0.642*  | 0.866** | -0.364   |
| W  | 0.883**  | 0.364    | -0.805** | -0.871** | 0.645*  | 0.868** | -0.533   | -0.316 | -0.254 | 0.305  | 0.031   | -0.232  | -0.653*  | 0.132  | -0.621*  | 0.400   | 0.706*   | 0.387   | -0.022   | 0.199   | 0.349   | -0.669*  | 0.625*  | 0.354   | 0.179   | 0.713**  |
| Tl | -0.787** | -0.838** | 0.495    | 0.420    | 0.098   | -0.572  | 0.887**  | -0.206 | -0.084 | -0.315 | -0.103  | 0.108   | 0.256    | 0.265  | 0.813**  | -0.006  | -0.649*  | -0.586* | -0.126   | -0.305  | -0.704* | 0.593*   | -0.296  | -0.327  | -0.332  | -0.174   |
| Pb | 0.649*   | 0.418    | -0.467   | -0.604*  | 0.258   | 0.421   | -0.553   | 0.118  | -0.136 | 0.208  | -0.271  | -0.703* | -0.500   | -0.371 | -0.699*  | 0.161   | 0.950**  | 0.460   | -0.192   | -0.167  | 0.169   | -0.824** | 0.350   | -0.172  | -0.107  | 0.526    |
| Bi | 0.859**  | 0.732**  | -0.564   | -0.599*  | 0.145   | 0.871** | -0.761** | 0.102  | 0.115  | 0.146  | 0.499   | 0.261   | -0.126   | 0.087  | -0.648*  | 0.013   | 0.394    | 0.685*  | 0.508    | 0.661*  | 0.780** | -0.424   | 0.272   | 0.663*  | 0.642*  | 0.162    |
| Th | 0.016    | 0.057    | -0.043   | -0.030   | -0.105  | -0.200  | -0.185   | -0.178 | -0.146 | 0.278  | -0.456  | -0.557  | -0.571   | -0.229 | -0.192   | 0.445   | 0.391    | -0.353  | -0.761** | -0.406  | -0.087  | -0.375   | 0.515   | -0.181  | -0.518  | 0.414    |
| U  | 0.641*   | 0.116    | -0.645*  | -0.807** | 0.643*  | 0.527   | -0.334   | -0.315 | -0.398 | 0.201  | -0.288  | -0.655* | -0.774** | -0.069 | -0.488   | 0.526   | 0.845**  | 0.194   | -0.387   | -0.164  | 0.045   | -0.742** | 0.680*  | -0.001  | -0.184  | 0.843**  |
| La | 0.655*   | 0.259    | -0.754** | -0.672*  | 0.497   | 0.502   | -0.408   | -0.418 | -0.485 | 0.258  | -0.305  | -0.428  | -0.669*  | 0.077  | -0.417   | 0.532   | 0.716**  | 0.197   | -0.340   | 0.030   | 0.287   | -0.528   | 0.751** | 0.247   | 0.028   | 0.715**  |
| Ce | 0.787**  | 0.680*   | -0.434   | -0.651*  | 0.110   | 0.797** | -0.727** | 0.263  | 0.128  | -0.135 | 0.650*  | 0.112   | -0.067   | -0.006 | -0.606*  | -0.020  | 0.446    | 0.764** | 0.548    | 0.674*  | 0.725** | -0.477   | 0.202   | 0.597*  | 0.633*  | 0.113    |
| Pr | 0.321    | 0.050    | -0.489   | -0.453   | 0.323   | 0.272   | -0.171   | -0.545 | -0.452 | 0.212  | -0.228  | -0.199  | -0.659*  | 0.280  | -0.089   | 0.797** | 0.292    | -0.223  | -0.529   | 0.114   | 0.269   | -0.247   | 0.932** | 0.447   | -0.075  | 0.695*   |
| Nd | 0.356    | 0.075    | -0.518   | -0.481   | 0.336   | 0.295   | -0.199   | -0.538 | -0.457 | 0.218  | -0.233  | -0.215  | -0.669*  | 0.260  | -0.123   | 0.786** | 0.331    | -0.188  | -0.520   | 0.113   | 0.284   | -0.276   | 0.931** | 0.442   | -0.061  | 0.703*   |
| Sm | 0.338    | 0.051    | -0.499   | -0.480   | 0.342   | 0.281   | -0.182   | -0.539 | -0.457 | 0.206  | -0.242  | -0.248  | -0.680*  | 0.254  | -0.109   | 0.796** | 0.339    | -0.204  | -0.539   | 0.088   | 0.251   | -0.287   | 0.935** | 0.418   | -0.094  | 0.718**  |
| Eu | 0.488    | 0.137    | -0.617*  | -0.600*  | 0.426   | 0.404   | -0.302   | -0.501 | -0.493 | 0.157  | -0.157  | -0.306  | -0.711** | 0.243  | -0.233   | 0.746** | 0.480    | -0.050  | -0.464   | 0.138   | 0.302   | -0.384   | 0.919** | 0.436   | -0.008  | 0.738**  |
| Gd | 0.419    | 0.151    | -0.540   | -0.518   | 0.319   | 0.378   | -0.257   | -0.502 | -0.402 | 0.224  | -0.150  | -0.150  | -0.637*  | 0.293  | -0.163   | 0.756** | 0.331    | -0.113  | -0.421   | 0.203   | 0.363   | -0.292   | 0.920** | 0.521   | 0.034   | 0.678*   |
| Tb | 0.413    | 0.144    | -0.554   | -0.479   | 0.321   | 0.319   | -0.271   | -0.503 | -0.443 | 0.264  | -0.256  | -0.237  | -0.669*  | 0.229  | -0.197   | 0.740** | 0.394    | -0.131  | -0.503   | 0.103   | 0.312   | -0.315   | 0.906** | 0.421   | -0.041  | 0.693*   |
| Dy | 0.420    | 0.122    | -0.569   | -0.521   | 0.360   | 0.343   | -0.248   | -0.524 | -0.452 | 0.260  | -0.247  | -0.235  | -0.690*  | 0.247  | -0.191   | 0.763** | 0.394    | -0.136  | -0.502   | 0.105   | 0.302   | -0.327   | 0.923** | 0.428   | -0.038  | 0.719**  |
| Y  | 0.114    | -0.136   | -0.299   | -0.497   | 0.316   | 0.302   | 0.149    | -0.469 | -0.367 | -0.157 | 0.195   | 0.177   | -0.341   | 0.658* | 0.292    | 0.824** | -0.129   | -0.197  | -0.145   | 0.522   | 0.343   | 0.067    | 0.851** | 0.778** | 0.280   | 0.529    |
| Ho | 0.520    | 0.206    | -0.636*  | -0.581*  | 0.384   | 0.440   | -0.333   | -0.500 | -0.434 | 0.259  | -0.175  | -0.195  | -0.673*  | 0.260  | -0.256   | 0.718** | 0.438    | -0.027  | -0.404   | 0.182   | 0.382   | -0.356   | 0.906** | 0.493   | 0.068   | 0.706*   |
| Er | 0.602*   | 0.352    | -0.664*  | -0.565   | 0.303   | 0.505   | -0.453   | -0.422 | -0.358 | 0.301  | -0.115  | -0.111  | -0.599*  | 0.223  | -0.350   | 0.611*  | 0.452    | 0.090   | -0.285   | 0.262   | 0.503   | -0.367   | 0.835** | 0.545   | 0.179   | 0.613*   |
| Tm | 0.648*   | 0.425    | -0.673*  | -0.558   | 0.269   | 0.527   | -0.530   | -0.351 | -0.346 | 0.280  | -0.088  | -0.105  | -0.547   | 0.139  | -0.419   | 0.544   | 0.486    | 0.180   | -0.227   | 0.296   | 0.568   | -0.387   | 0.788** | 0.542   | 0.212   | 0.563    |
| Yb | 0.585*   | 0.362    | -0.647*  | -0.531   | 0.272   | 0.495   | -0.453   | -0.411 | -0.353 | 0.280  | -0.081  | -0.046  | -0.549   | 0.244  | -0.322   | 0.603*  | 0.396    | 0.095   | -0.248   | 0.318   | 0.547   | -0.311   | 0.827** | 0.596*  | 0.224   | 0.574    |

|           |         |       |         |        |       |        |         |        |        |       |       |       |        |       |        |       |       |       |        |       |        |        |        |        |       |       |
|-----------|---------|-------|---------|--------|-------|--------|---------|--------|--------|-------|-------|-------|--------|-------|--------|-------|-------|-------|--------|-------|--------|--------|--------|--------|-------|-------|
| <b>Lu</b> | 0.724** | 0.550 | -0.687* | -0.539 | 0.209 | 0.614* | -0.619* | -0.250 | -0.243 | 0.330 | 0.006 | 0.033 | -0.444 | 0.166 | -0.501 | 0.429 | 0.455 | 0.297 | -0.059 | 0.410 | 0.681* | -0.371 | 0.692* | 0.613* | 0.358 | 0.465 |
|-----------|---------|-------|---------|--------|-------|--------|---------|--------|--------|-------|-------|-------|--------|-------|--------|-------|-------|-------|--------|-------|--------|--------|--------|--------|-------|-------|

|           | Cd       | Cs       | Ba      | Hf      | Ta      | W       | Tl       | Pb      | Bi      | Th     | U       | La      | Ce    | Pr      | Nd      | Sm      | Eu      | Gd      | Tb      | Dy      | Y       | Ho      | Er | Tm | Yb | Lu |
|-----------|----------|----------|---------|---------|---------|---------|----------|---------|---------|--------|---------|---------|-------|---------|---------|---------|---------|---------|---------|---------|---------|---------|----|----|----|----|
| <b>Cd</b> | 1        |          |         |         |         |         |          |         |         |        |         |         |       |         |         |         |         |         |         |         |         |         |    |    |    |    |
| <b>Cs</b> | -0.434   | 1        |         |         |         |         |          |         |         |        |         |         |       |         |         |         |         |         |         |         |         |         |    |    |    |    |
| <b>Ba</b> | 0.564    | 0.112    | 1       |         |         |         |          |         |         |        |         |         |       |         |         |         |         |         |         |         |         |         |    |    |    |    |
| <b>Hf</b> | 0.534    | 0.437    | 0.738** | 1       |         |         |          |         |         |        |         |         |       |         |         |         |         |         |         |         |         |         |    |    |    |    |
| <b>Ta</b> | 0.630*   | 0.137    | 0.675*  | 0.898** | 1       |         |          |         |         |        |         |         |       |         |         |         |         |         |         |         |         |         |    |    |    |    |
| <b>W</b>  | 0.743**  | -0.681*  | 0.521   | 0.096   | 0.268   | 1       |          |         |         |        |         |         |       |         |         |         |         |         |         |         |         |         |    |    |    |    |
| <b>Tl</b> | -0.907** | 0.497    | -0.301  | -0.332  | -0.393  | -0.648* | 1        |         |         |        |         |         |       |         |         |         |         |         |         |         |         |         |    |    |    |    |
| <b>Pb</b> | 0.605*   | -0.812** | -0.093  | -0.239  | -0.093  | 0.671*  | -0.690*  | 1       |         |        |         |         |       |         |         |         |         |         |         |         |         |         |    |    |    |    |
| <b>Bi</b> | 0.937**  | -0.313   | 0.734** | 0.662*  | 0.765** | 0.754** | -0.779** | 0.385   | 1       |        |         |         |       |         |         |         |         |         |         |         |         |         |    |    |    |    |
| <b>Th</b> | 0.096    | -0.476   | -0.313  | -0.484  | -0.542  | 0.151   | -0.434   | 0.467   | -0.100  | 1      |         |         |       |         |         |         |         |         |         |         |         |         |    |    |    |    |
| <b>U</b>  | 0.492    | -0.817** | 0.141   | -0.324  | -0.185  | 0.850** | -0.515   | 0.862** | 0.383   | 0.423  | 1       |         |       |         |         |         |         |         |         |         |         |         |    |    |    |    |
| <b>La</b> | 0.568    | -0.598*  | 0.314   | -0.093  | -0.101  | 0.815** | -0.625*  | 0.788** | 0.460   | 0.490  | 0.910** | 1       |       |         |         |         |         |         |         |         |         |         |    |    |    |    |
| <b>Ce</b> | 0.909**  | -0.358   | 0.685*  | 0.636*  | 0.783** | 0.677*  | -0.720** | 0.431   | 0.936** | -0.144 | 0.385   | 0.412   | 1     |         |         |         |         |         |         |         |         |         |    |    |    |    |
| <b>Pr</b> | 0.386    | -0.381   | 0.392   | -0.078  | -0.204  | 0.583*  | -0.501   | 0.402   | 0.332   | 0.696* | 0.622*  | 0.786** | 0.213 | 1       |         |         |         |         |         |         |         |         |    |    |    |    |
| <b>Nd</b> | 0.413    | -0.405   | 0.395   | -0.075  | -0.192  | 0.613*  | -0.528   | 0.440   | 0.354   | 0.690* | 0.654*  | 0.815** | 0.238 | 0.998** | 1       |         |         |         |         |         |         |         |    |    |    |    |
| <b>Sm</b> | 0.394    | -0.421   | 0.372   | -0.105  | -0.221  | 0.604*  | -0.509   | 0.450   | 0.332   | 0.704* | 0.664*  | 0.817** | 0.223 | 0.998** | 0.998** | 1       |         |         |         |         |         |         |    |    |    |    |
| <b>Eu</b> | 0.503    | -0.496   | 0.431   | -0.054  | -0.104  | 0.721** | -0.580*  | 0.546   | 0.436   | 0.632* | 0.757** | 0.886** | 0.371 | 0.960** | 0.969** | 0.968** | 1       |         |         |         |         |         |    |    |    |    |
| <b>Gd</b> | 0.494    | -0.403   | 0.478   | 0.026   | -0.084  | 0.656*  | -0.579*  | 0.443   | 0.450   | 0.635* | 0.646*  | 0.818** | 0.329 | 0.990** | 0.993** | 0.989** | 0.965** | 1       |         |         |         |         |    |    |    |    |
| <b>Tb</b> | 0.459    | -0.431   | 0.371   | -0.066  | -0.173  | 0.642*  | -0.583*  | 0.496   | 0.386   | 0.702* | 0.681*  | 0.843** | 0.265 | 0.991** | 0.995** | 0.993** | 0.974** | 0.990** | 1       |         |         |         |    |    |    |    |
| <b>Dy</b> | 0.456    | -0.445   | 0.394   | -0.071  | -0.166  | 0.665*  | -0.570   | 0.493   | 0.390   | 0.675* | 0.699*  | 0.849** | 0.270 | 0.989** | 0.995** | 0.991** | 0.975** | 0.990** | 0.997** | 1       |         |         |    |    |    |    |
| <b>Y</b>  | 0.288    | -0.054   | 0.738** | 0.271   | 0.110   | 0.421   | -0.185   | 0.012   | 0.349   | 0.197  | 0.316   | 0.490   | 0.287 | 0.771** | 0.762** | 0.753** | 0.717** | 0.789** | 0.717** | 0.739** | 1       |         |    |    |    |    |
| <b>Ho</b> | 0.545    | -0.453   | 0.476   | 0.023   | -0.055  | 0.740** | -0.624*  | 0.527   | 0.496   | 0.596* | 0.731** | 0.884** | 0.381 | 0.968** | 0.978** | 0.971** | 0.980** | 0.986** | 0.985** | 0.990** | 0.740** | 1       |    |    |    |    |
| <b>Er</b> | 0.647*   | -0.429   | 0.522   | 0.144   | 0.067   | 0.759** | -0.723** | 0.542   | 0.600*  | 0.556  | 0.696*  | 0.875** | 0.474 | 0.932** | 0.946** | 0.934** | 0.950** | 0.968** | 0.961** | 0.963** | 0.704*  | 0.987** | 1  |    |    |    |

|           |         |        |        |       |       |         |          |        |         |       |        |         |        |         |         |         |         |         |         |         |         |         |         |         |         |   |
|-----------|---------|--------|--------|-------|-------|---------|----------|--------|---------|-------|--------|---------|--------|---------|---------|---------|---------|---------|---------|---------|---------|---------|---------|---------|---------|---|
| <b>Tm</b> | 0.709** | -0.430 | 0.521  | 0.185 | 0.112 | 0.765** | -0.782** | 0.576* | 0.649*  | 0.546 | 0.692* | 0.872** | 0.532  | 0.903** | 0.919** | 0.906** | 0.931** | 0.944** | 0.938** | 0.937** | 0.654*  | 0.968** | 0.994** | 1       |         |   |
| <b>Yb</b> | 0.652*  | -0.369 | 0.559  | 0.200 | 0.101 | 0.734** | -0.717** | 0.492  | 0.617*  | 0.531 | 0.647* | 0.843** | 0.484  | 0.929** | 0.941** | 0.928** | 0.937** | 0.966** | 0.954** | 0.954** | 0.725** | 0.979** | 0.997** | 0.992** | 1       |   |
| <b>Lu</b> | 0.799** | -0.374 | 0.587* | 0.333 | 0.282 | 0.779** | -0.837** | 0.527  | 0.760** | 0.428 | 0.608* | 0.793** | 0.616* | 0.819** | 0.835** | 0.814** | 0.850** | 0.879** | 0.864** | 0.863** | 0.618*  | 0.909** | 0.960** | 0.974** | 0.966** | 1 |

## GR-Growth rates

The values followed by \* are correlations.at 95% confidence level.

The values followed by \*\* are correlations.at 99% confidence level.
